# Supplementary material for: Indoleamine 2,3-Dioxygenase (IDO) Enzyme Links Innate Immunity and Altered T-Cell Differentiation in Non-ST Segment Elevation Acute Coronary Syndrome
Source: PubMed Central journal article supplement (PMC5796013; doi:10.3390/ijms19010063), 2017-12-26
Supplement: ijms-19-00063-s001.pdf [file ijms-19-00063-s001.pdf]

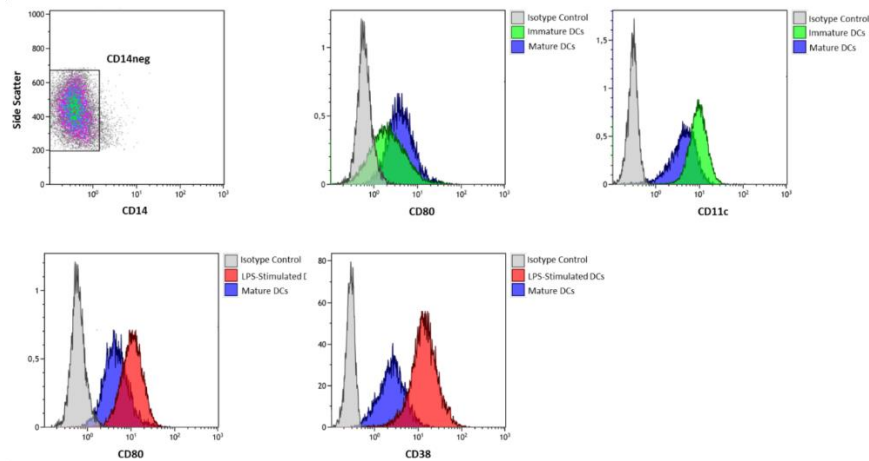

**Supplementary Figure 1.** *Upper panels:* Immature MDDCs were identified as CD14-CD11c<sup>+</sup> CD80<sup>low/null</sup> (green histogram) while mature MDDCs were CD11c<sup>low</sup> CD80<sup>high</sup> (blue histogram). *Lower panel:* MDDCs maturation was assessed measuring the expression of CD80 and CD38.

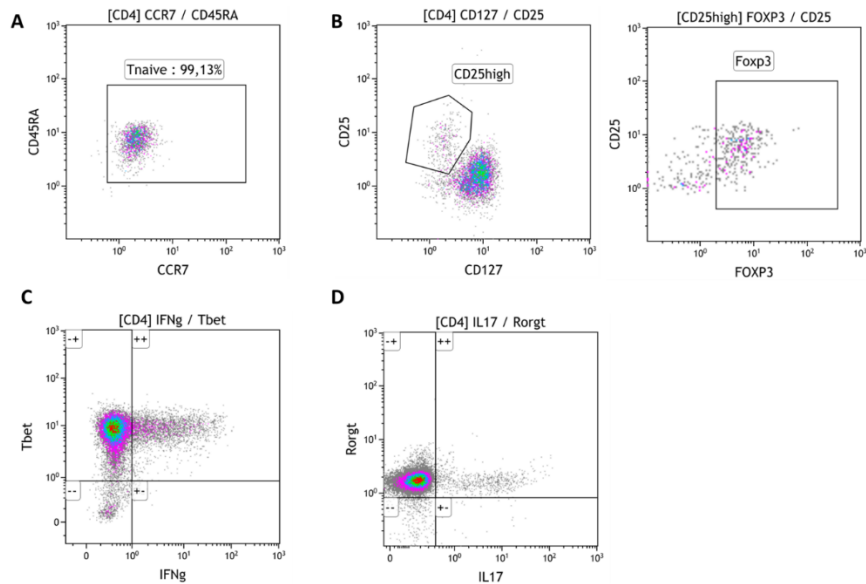

**Supplementary Figure 2.** (A) Highly enriched naïve CD4<sup>+</sup> purity was assessed using CD45RA and CCR7 antibody. (B) Treg were identified as CD25<sup>high</sup>CD127<sup>low</sup>Foxp3<sup>+</sup>. (C) Th1 cells were identified as Tbet<sup>+</sup>IFN $\gamma$ <sup>+</sup>. (D) Th17 cells were identified as Ror $\gamma$ t<sup>+</sup>IL17<sup>+</sup>.

**Supplementary Table 1A.** Univariate and multivariate logistic regression analysis to individuate the variables independently associated with CD80 expression on mMDDCs.

|                         | Univariate Analysis |          | Multivariate Analysis |          |
|-------------------------|---------------------|----------|-----------------------|----------|
|                         | HR (CI 95%)         | <i>p</i> | HR (CI 95%)           | <i>p</i> |
| Age                     | 1.05 (1.01–1.09)    | 0.008    | 1.02 (0.96–1.08)      | 0.44     |
| Sex                     | 0.45 (0.18–1.08)    | 0.07     | 1.46 (0.44–4.9)       | 0.53     |
| NSTEMI diagnosis        | 2.61 (1.21–5.65)    | 0.001    | 2.28 (0.79–6.57)      | 0.02 *   |
| Familial History of IHD | 0.72 (0.33–1.56)    | 0.4      |                       |          |
| Hypertension            | 1.57 (0.74–3.33)    | 0.24     |                       |          |
| Hypercholesterolemia    | 1.16 (0.55–2.45)    | 0.7      |                       |          |
| Smoke                   | 1.14 (0.53–2.41)    | 0.7      |                       |          |

|                                      |                  |      |                  |      |
|--------------------------------------|------------------|------|------------------|------|
| Diabetes                             | 2.61 (0.6–10.4)  | 0.17 |                  |      |
| Statin treatment                     | 1.11 (1.02–1.21) | 0.01 | 1.08 (0.98–1.21) | 0.11 |
| ACE-inhibitor/ARB treatment          | 0.80 (0.24–2.68) | 0.73 |                  |      |
| Oral antidiabetics/insulin treatment | 0.97(0.86–1.09)  | 0.63 |                  |      |
| Acetylsalicylic acid treatment       | 0.76 (0.20–2.78) | 0.67 |                  |      |

The analysis included 18 NSTEMI patients, 16 SA patients and 16 HC subjects. **IHD** = ischemic heart disease; **ARBs** = Angiotensin II receptor blockers. \* Only the diagnosis of NSTEMI at the time of study enrollment was independently associated with CD80 expression on mMDDCs.

**Supplementary Table 1B.** Univariate and multivariate logistic regression analysis to individuate the variables independently associated with IDO mRNA expression in mMDDCs.

|                                      | Univariate Analysis |          | Multivariate Analysis |          |
|--------------------------------------|---------------------|----------|-----------------------|----------|
|                                      | HR (CI 95%)         | <i>p</i> | HR (CI 95%)           | <i>p</i> |
| Age                                  | 1.02 (0.96–1.07)    | 0.48     | 1.00 (0.94–1.07)      | 0.85     |
| Sex                                  | 0.57 (0.18–1.77)    | 0.3      | 0.76 (0.20–2.78)      | 0.67     |
| NSTEMI diagnosis                     | 5.6 (2.24–14.9)     | 0.001    | 3.32 (1.02–10.8)      | 0.04*    |
| Familial History of IHD              | 1.3 (0.27–6.19)     | 0.7      |                       |          |
| Hypertension                         | 0.5 (0.16–1.57)     | 0.23     |                       |          |
| Hypercholesterolemia                 | 1.35 (0.33–5.42)    | 0.6      |                       |          |
| Smoke                                | 0.87 (0.27–2.75)    | 0.81     |                       |          |
| Diabetes                             | 2.8 (0.96–8.13)     | 0.06     |                       |          |
| Statin treatment                     | 2.8 (0.96–8.13)     | 0.05     | 2.0 (0.6–6.9)         | 0.26     |
| ACE-inhibitor/ARB treatment          | 1.00 (0.88–1.13)    | 0.94     |                       |          |
| Oral antidiabetics/insulin treatment | 1.02 (0.96–1.07)    | 0.48     |                       |          |
| Acetylsalicylic acid treatment       | 0.57 (0.18–1.77)    | 0.3      |                       |          |

The analysis included 18 NSTEMI patients, 16 SA patients and 16 HC subjects. **IHD** = ischemic heart disease; **ARBs** = Angiotensin II receptor blockers. \* Only the diagnosis of NSTEMI at the time of study enrolment was independently associated with IDO mRNA expression in mMDDCs.
